# Supplementary figures and images for: Mutations that prevent phosphorylation of the BMP4 prodomain impair proteolytic maturation of homodimers leading to lethality in mice
Source: eLife journal article supplement (doi:10.7554/elife.105018), 2025-01-16

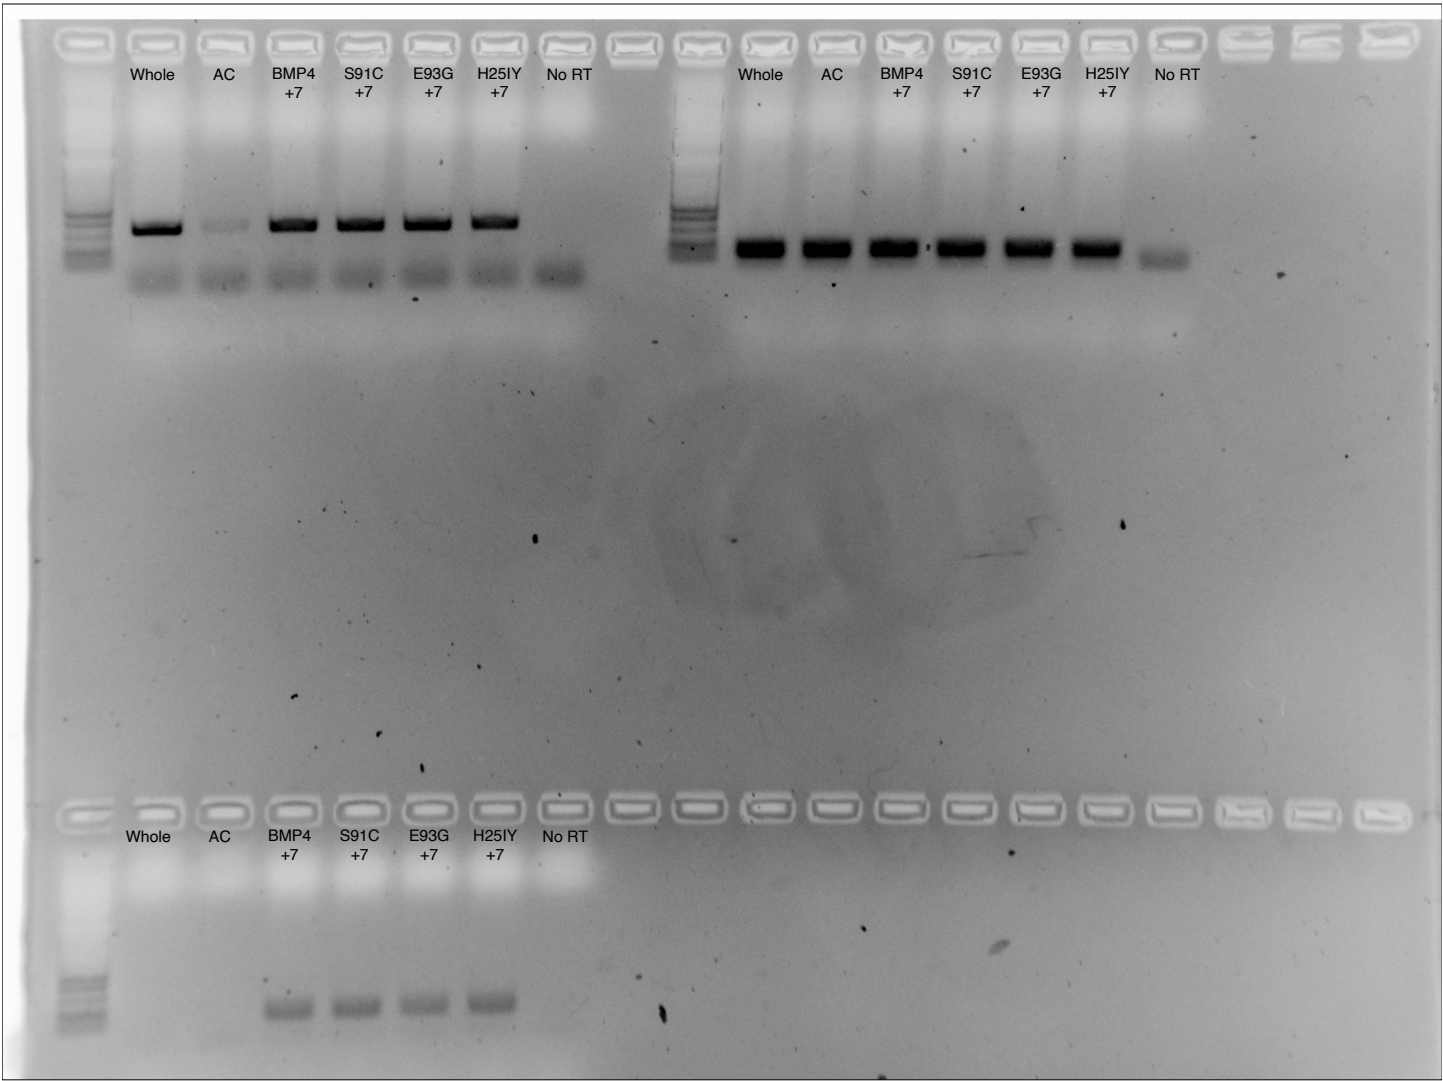

Supplement: fig1-data4 [file Fig. 1G 2022-04-08_heterodimer PCR.pdf › Figure 1. source data 4/Fig. 1G 2022-04-08_heterodimer PCR.pdf]
